# Supplementary material
Source: MDPI journal article supplement (https://www.mdpi.com/1996-1073/16/4/1733)
Supplement: s1 [file s1]

# Supporting Information

## Nitrogen-doped porous carbon nanosheets based on Schiff base reaction for high-performance lithium-ion batteries anode

Mai Li <sup>1</sup>, Zhi Cheng <sup>1</sup>, Jingrui Sun <sup>1</sup>, Yu Tian <sup>1</sup>, Jiawei He <sup>1</sup>, Yutian Chen <sup>1</sup>, Yang Bai <sup>1,\*</sup>, Zhiming Liu <sup>1,\*</sup>

<sup>1</sup> College of Electromechanical Engineering, Shandong Engineering Laboratory for Preparation and Application of High-Performance Carbon-Materials, Qingdao University of Science & Technology, Qingdao 266061, PR China;

\* To whom correspondence should be addressed. E-mail: 61496998@qq.com; zmliu@qust.edu.cn.

### 1. Figures and Tables

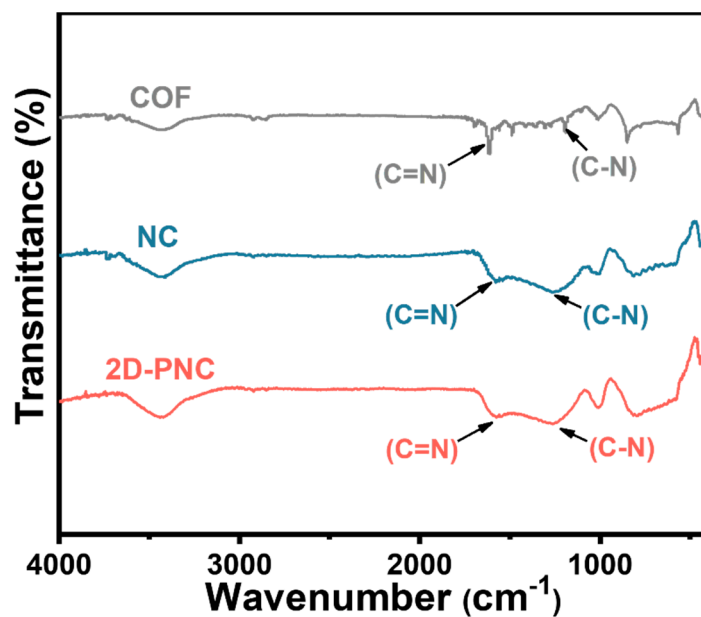

Figure S1. FTIR of COF, NC, and 2D-PNC.

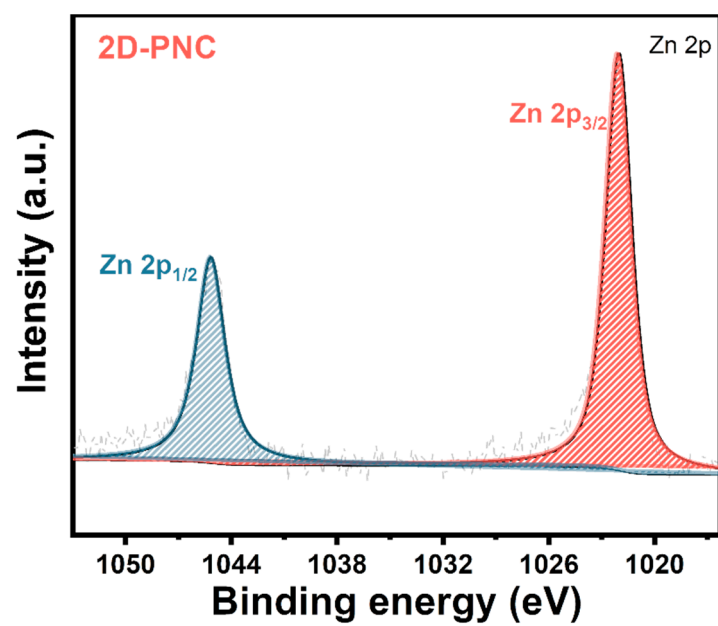

Figure S2. Zn 2P XPS spectra of the 2D-PNC.

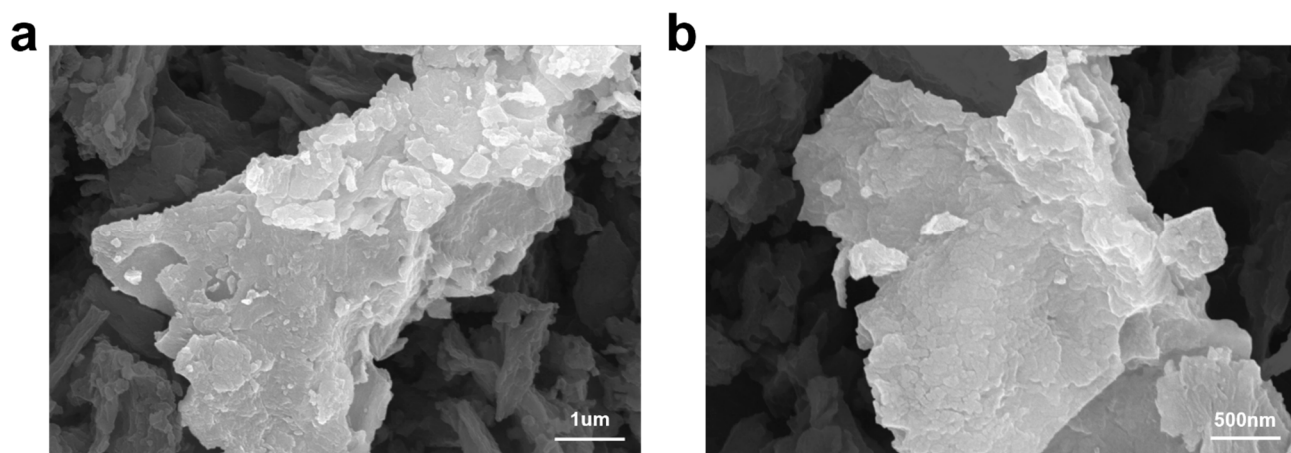

Figure S3. (a, b) SEM images of NC.

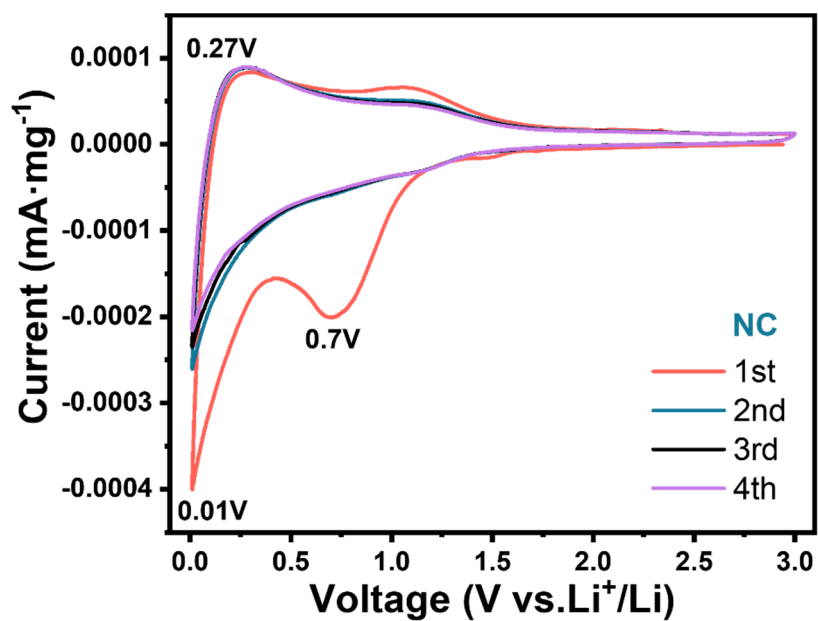

Figure S4. CV curves for the first four cycles at  $0.1 \text{ mV} \cdot \text{s}^{-1}$  of NC.

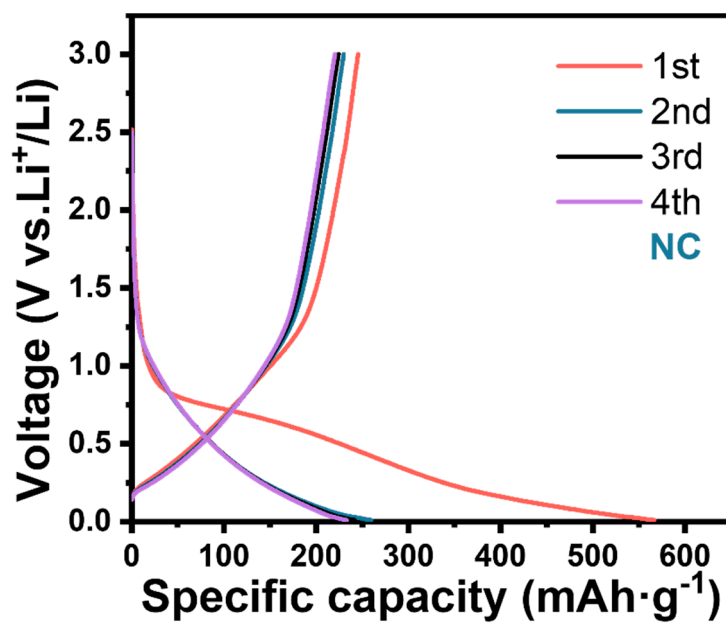

Figure S5. Charge/discharge voltage profiles for the first four cycles at  $0.2 \text{ A} \cdot \text{g}^{-1}$  of NC.

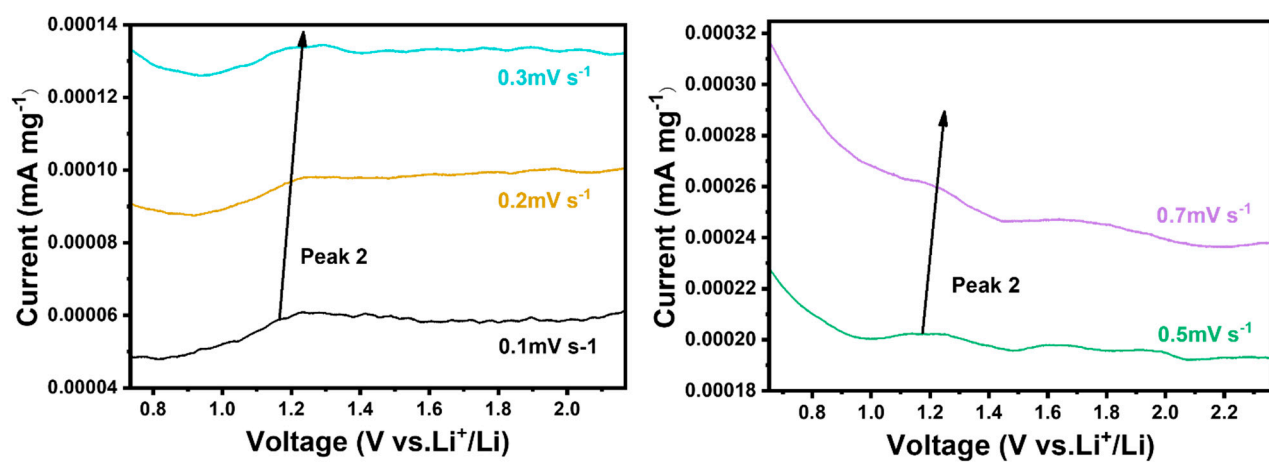

Figure S6. The zoomed-in figures of CV curves of 2D-PNC at different scan rates.

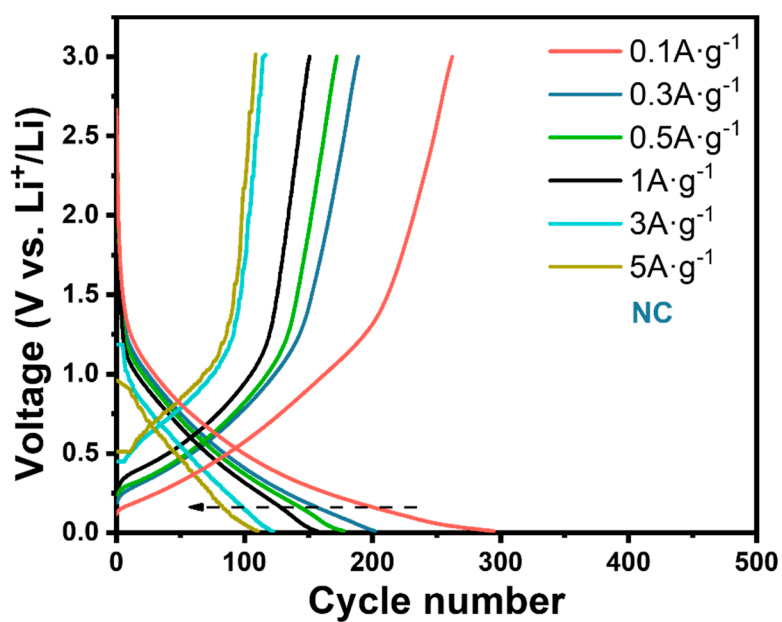

Figure S7. The corresponding voltage profiles at various current densities from 0.1 to 5 A·g<sup>-1</sup> of NC

**Table S1.** The values of different scan rates ( $\text{mV s}^{-1}$ ) and the corresponding current peaks ( $\text{mA} \cdot \text{mg}^{-1}$ ).

| $v$ | Peak 1    | Peak 2   |
|-----|-----------|----------|
| 0.1 | -0.000033 | 0.000059 |
| 0.2 | -0.000074 | 0.000096 |
| 0.3 | -0.00011  | 0.00013  |
| 0.5 | -0.00018  | 0.00020  |
| 0.7 | -0.00026  | 0.00026  |
| 1.0 | -0.00037  | 0.00034  |
| 2.0 | -0.00076  | 0.00060  |
| 3.0 | -0.0011   | 0.00081  |
